# Supplementary material
Source: PubMed Central journal article supplement (PMC3430349)
Supplement: JB.00731-12_zjb999091808so1.pdf [file JB.00731-12_zjb999091808so1.pdf]

**SUPPLEMENTAL TABLE 1. Primers used for PCR amplification**

| Primer name                         | Sequences (5'-3')*                                                | Target sequences                                                                           |
|-------------------------------------|-------------------------------------------------------------------|--------------------------------------------------------------------------------------------|
| FlgA1 <i>Bam</i> HI<br>Upstream FW  | AGTATGGATCCCGTCCTCGT<br>CGTCCA                                    | 700 bp upstream of <i>flgA1</i> start codon,<br>extension towards gene                     |
| FlgA1 Upstream<br>Downstream RV     | TGAACATTTGAATCTCCTCA<br>CATAGATTTCGTGGGTTTGG                      | <i>flgA1</i> start codon, extension away from<br>gene (fused with <i>flgA1</i> stop codon) |
| FlgA1<br>UpstreamDownstream<br>m FW | CCAAACCCACGAAATCTATG<br>TGAGGAGATTCAAATGTTCA                      | <i>flgA1</i> stop codon, extension away from<br>gene (fused with <i>flgA1</i> start codon) |
| FlgA1 <i>Xba</i> I<br>Downstream RV | AGCTTCTAGAAAATGAAAG<br>GAAAGTTTCGG                                | 700 bp downstream of <i>flgA1</i> stop<br>codon, extension towards gene                    |
| FlgA1 <i>Nde</i> I FW               | ATTAATCATATGTTTCGAAAA<br>CATCAACGAA                               | <i>flgA1</i> start codon, extension towards<br>gene                                        |
| FlgA2 6-His <i>Eco</i> RI<br>RV     | TATATTGAATTCTCAGTGATG<br>GTGATGGTGATGCGGGCCGC<br>CCAGTTCGACGGGT   | 1 bp upstream of <i>flgA2</i> stop codon,<br>extension towards gene                        |
| FlgA2 <i>Nde</i> I FW               | ATTAATCATATGTTCAACAA<br>CATCACTGACG                               | <i>flgA2</i> start codon, extension towards<br>gene                                        |
| FlgA1 6-His <i>Eco</i> RI<br>RV     | TATATTGAATTCTCAGTGATG<br>GTGATGGTGATGCGGGCCGC<br>CGAGCGCAATGGGGTC | 1 bp upstream of <i>flgA1</i> stop codon,<br>extension towards gene                        |
| N70QFV                              | CCACGGCTTGTTTCAGAAGA<br>CCGCGAGG                                  | Single mutation of the amino acid N<br>with Q at position 70 (forward)                     |
| N70QRV                              | CCTCGCCGGTCTTCTGAACC<br>AAGCCGTGG                                 | Single mutation of the amino acid N<br>with Q at position 70 (reverse)                     |
| N115QFW                             | CGAACCTCACCTACCAGGA<br>CACCGTCACCGGC                              | Single mutation of the amino acid N<br>with Q at position 115 (forward)                    |
| N115QRV                             | GCCGGTGACGGTGTCTGCTGGT<br>AGGTGAGGGTTCG                           | Single mutation of the amino acid N<br>with Q at position 115 (reverse)                    |
| N172Q                               | GGGTGACAACCCAGGGG<br>ACGCCACGG                                    | Single mutation of the amino acid N<br>with Q at position 172 (forward)                    |

|       |                                                 |                                                                     |
|-------|-------------------------------------------------|---------------------------------------------------------------------|
| N172Q | <u>CCGTGGCCGTCCCCTGGGTG</u><br><u>TTGTCACCC</u> | Single mutation of the aminoacid N with Q at position 172 (reverse) |
|-------|-------------------------------------------------|---------------------------------------------------------------------|

\*Restriction endonuclease sites are underlined. Sequences encoding 6xHis tags are italicized

**Supplemental Table 2. Complete list of identified peptides of *Hfx. volcanii* Flagellin A1.** 35-kDa band from CsCl purification was excised from the gel and analysed using a nanoLC-QIT-MS/MS after digestion with trypsin, endoproteinase GluC or double digestion with both enzyme.

| Peptide                         | MH+     | DeltaM | z | P (pep)  | Sf   | XC   | DeltaCn |
|---------------------------------|---------|--------|---|----------|------|------|---------|
| Trypsin                         |         |        |   |          |      |      |         |
| R.LAAGSGSVSLEDTTVKYLSETTAR.T    | 2456.25 | 0.70   | 3 | 7.57E-09 | 0.98 | 6.14 | 0.63    |
| R.LAAGSGSVSLEDTTVKYLSETTAR.T    | 2456.25 | 1.23   | 3 | 1.02E-09 | 0.97 | 6.09 | 0.61    |
| R.LAAGSGSVSLEDTTVKYLSETTAR.T    | 2456.25 | 1.23   | 3 | 2.12E-11 | 0.97 | 5.99 | 0.49    |
| R.LAAGSGSVSLEDTTVKYLSETTAR.T    | 2456.25 | 1.06   | 3 | 4.63E-09 | 0.97 | 5.79 | 0.53    |
| R.LAAGSGSVSLEDTTVKYLSETTAR.T    | 2456.25 | 1.41   | 3 | 4.48E-08 | 0.98 | 5.57 | 0.59    |
| K.TGEERTVDQIFLTVR.L             | 1763.93 | 0.90   | 3 | 6.81E-04 | 0.98 | 5.55 | 0.45    |
| R.LAAGSGSVSLEDTTVKYLSETTAR.T    | 2456.25 | 1.49   | 3 | 1.77E-13 | 0.97 | 5.51 | 0.51    |
| R.LAAGSGSVSLEDTTVK.Y            | 1534.80 | 0.27   | 2 | 2.77E-06 | 0.98 | 5.42 | 0.72    |
| R.LAAGSGSVSLEDTTVK.Y            | 1534.80 | 0.42   | 2 | 3.90E-09 | 0.98 | 5.37 | 0.68    |
| R.LAAGSGSVSLEDTTVK.Y            | 1534.80 | 0.53   | 2 | 2.55E-08 | 0.98 | 5.32 | 0.67    |
| R.LAAGSGSVSLEDTTVK.Y            | 1534.80 | 0.59   | 2 | 2.40E-09 | 0.98 | 5.24 | 0.71    |
| K.TGEERTVDQIFLTVR.L             | 1763.93 | 0.67   | 3 | 1.20E-05 | 0.97 | 5.20 | 0.45    |
| R.LAAGSGSVSLEDTTVK.Y            | 1534.80 | 1.31   | 2 | 1.54E-08 | 0.98 | 5.17 | 0.71    |
| R.LAAGSGSVSLEDTTVKYLSETTAR.T    | 2456.25 | 1.44   | 3 | 4.86E-05 | 0.96 | 5.16 | 0.47    |
| R.LAAGSGSVSLEDTTVK.Y            | 1534.80 | 0.61   | 2 | 4.30E-08 | 0.98 | 5.16 | 0.70    |
| R.LAAGSGSVSLEDTTVK.Y            | 1534.80 | 0.44   | 2 | 2.43E-08 | 0.98 | 5.15 | 0.68    |
| K.TGEERTVDQIFLTVR.L             | 1763.93 | 0.71   | 3 | 1.34E-02 | 0.96 | 5.08 | 0.36    |
| R.LAAGSGSVSLEDTTVKYLSETTAR.T    | 2456.25 | 0.91   | 3 | 1.87E-05 | 0.95 | 5.05 | 0.54    |
| K.TGEERTVDQIFLTVR.L             | 1763.93 | 0.83   | 3 | 1.74E-06 | 0.98 | 5.04 | 0.43    |
| R.NGGTAQVILTM*PQQLAGKDNNDPIAL.- | 2695.38 | 1.07   | 3 | 2.65E-07 | 0.97 | 5.01 | 0.59    |
| R.NGGTAQVILTMPQQLAGKDNNDPIAL.-  | 2679.38 | 1.33   | 2 | 1.19E-04 | 0.96 | 5.00 | 0.62    |
| R.LAAGSGSVSLEDTTVK.Y            | 1534.80 | 0.41   | 2 | 1.30E-05 | 0.98 | 4.98 | 0.71    |
| R.LAAGSGSVSLEDTTVK.Y            | 1534.80 | 0.51   | 2 | 1.15E-06 | 0.98 | 4.96 | 0.70    |
| K.TGEERTVDQIFLTVR.L             | 1763.93 | 1.33   | 3 | 5.19E-07 | 0.97 | 4.93 | 0.46    |
| K.TGEERTVDQIFLTVR.L             | 1763.93 | 0.93   | 3 | 4.82E-07 | 0.97 | 4.92 | 0.44    |
| R.LAAGSGSVSLEDTTVK.Y            | 1534.80 | 0.52   | 2 | 1.60E-09 | 0.97 | 4.90 | 0.71    |
| R.LAAGSGSVSLEDTTVKYLSETTAR.T    | 2456.25 | 1.73   | 3 | 3.39E-05 | 0.96 | 4.83 | 0.63    |
| R.LAAGSGSVSLEDTTVK.Y            | 1534.80 | 0.40   | 2 | 1.04E-08 | 0.97 | 4.81 | 0.68    |
| K.TGEERTVDQIFLTVR.L             | 1763.93 | 0.76   | 3 | 2.05E-04 | 0.97 | 4.80 | 0.50    |
| R.NGGTAQVILTM*PQQLAGK.D         | 1842.98 | 0.44   | 2 | 3.34E-07 | 0.97 | 4.73 | 0.50    |
| R.LAAGSGSVSLEDTTVK.Y            | 1534.80 | 0.38   | 2 | 3.35E-07 | 0.98 | 4.71 | 0.69    |
| K.TGEERTVDQIFLTVR.L             | 1763.93 | 0.74   | 3 | 4.93E-06 | 0.96 | 4.71 | 0.37    |
| R.LAAGSGSVSLEDTTVK.Y            | 1534.80 | 0.22   | 2 | 8.94E-11 | 0.97 | 4.70 | 0.73    |
| R.NGGTAQVILTM*PQQLAGK.D         | 1842.98 | 0.55   | 2 | 3.89E-05 | 0.97 | 4.65 | 0.52    |
| R.NGGTAQVILTMPQQLAGKDNNDPIAL.-  | 2679.38 | 1.19   | 2 | 3.90E-03 | 0.95 | 4.61 | 0.59    |
| R.NGGTAQVILTMPQQLAGKDNNDPIAL.-  | 2679.38 | 1.36   | 3 | 2.28E-07 | 0.95 | 4.59 | 0.60    |
| R.NGGTAQVILTM*PQQLAGK.D         | 1842.98 | 0.80   | 2 | 4.44E-07 | 0.95 | 4.58 | 0.50    |
| R.LAAGSGSVSLEDTTVK.Y            | 1534.80 | 0.37   | 2 | 2.33E-07 | 0.97 | 4.55 | 0.65    |
| R.LAAGSGSVSLEDTTVKYLSETTAR.T    | 2456.25 | 0.93   | 3 | 1.63E-06 | 0.95 | 4.55 | 0.66    |
| R.TVDQIFLTVR.L                  | 1191.67 | 0.51   | 2 | 9.47E-07 | 0.97 | 4.54 | 0.52    |
| R.LAAGSGSVSLEDTTVK.Y            | 1534.80 | 0.30   | 2 | 2.19E-05 | 0.97 | 4.53 | 0.63    |
| K.TGEERTVDQIFLTVR.L             | 1763.93 | 0.60   | 3 | 1.26E-03 | 0.97 | 4.50 | 0.43    |
| R.NGGTAQVILTMPQQLAGKDNNDPIAL.-  | 2679.38 | 1.51   | 2 | 5.36E-05 | 0.93 | 4.48 | 0.56    |
| R.LAAGSGSVSLEDTTVK.Y            | 1534.80 | 0.46   | 2 | 1.11E-06 | 0.96 | 4.44 | 0.66    |
| K.TGEERTVDQIFLTVR.L             | 1763.93 | 0.86   | 3 | 5.47E-03 | 0.96 | 4.42 | 0.51    |
| R.NGGTAQVILTMPQQLAGKDNNDPIAL.-  | 2679.38 | 1.43   | 2 | 4.96E-03 | 0.93 | 4.40 | 0.51    |
| R.LAAGSGSVSLEDTTVKYLSETTAR.T    | 2456.25 | 0.52   | 2 | 4.71E-09 | 0.95 | 4.39 | 0.66    |
| R.TVDQIFLTVR.L                  | 1191.67 | 0.28   | 2 | 1.58E-04 | 0.98 | 4.39 | 0.59    |
| R.LAAGSGSVSLEDTTVKYLSETTAR.T    | 2456.25 | 0.22   | 2 | 1.16E-08 | 0.94 | 4.37 | 0.60    |
| R.NGGTAQVILTM*PQQLAGK.D         | 1842.98 | 0.38   | 2 | 5.63E-05 | 0.97 | 4.36 | 0.53    |
| R.TVDQIFLTVR.L                  | 1191.67 | 0.34   | 2 | 1.18E-04 | 0.98 | 4.35 | 0.58    |
| R.LAAGSGSVSLEDTTVK.Y            | 1534.80 | 1.01   | 2 | 2.04E-09 | 0.96 | 4.35 | 0.69    |
| R.LAAGSGSVSLEDTTVKYLSETTAR.T    | 2456.25 | 1.07   | 3 | 1.31E-08 | 0.94 | 4.35 | 0.56    |
| R.NGGTAQVILTM*PQQLAGKDNNDPIAL.- | 2695.38 | 1.78   | 3 | 1.25E-03 | 0.95 | 4.34 | 0.51    |
| R.NGGTAQVILTM*PQQLAGKDNNDPIAL.- | 2695.38 | 1.48   | 3 | 5.89E-05 | 0.95 | 4.34 | 0.53    |

|                                       |         |       |   |          |      |      |      |
|---------------------------------------|---------|-------|---|----------|------|------|------|
| K.TGEERTVDQIFLTVR.L                   | 1763.93 | 0.47  | 2 | 1.41E-05 | 0.96 | 4.32 | 0.56 |
| R.TVDQIFLTVR.L                        | 1191.67 | 0.43  | 2 | 8.38E-06 | 0.97 | 4.32 | 0.54 |
| K.TGEERTVDQIFLTVR.L                   | 1763.93 | 1.14  | 3 | 3.34E-06 | 0.95 | 4.31 | 0.42 |
| R.NGGTAQVILTMPQQLAGKDNNDPIAL.-        | 2679.38 | 1.78  | 3 | 2.55E-09 | 0.96 | 4.29 | 0.51 |
| R.LAAGSGSVSLEDTTVKYLSETTAR.T          | 2456.25 | 0.15  | 2 | 3.40E-09 | 0.94 | 4.27 | 0.62 |
| R.NGGTAQVILTM*PQQLAGK.D               | 1842.98 | 0.72  | 2 | 3.78E-07 | 0.96 | 4.25 | 0.48 |
| R.NGGTAQVILTM*PQQLAGKDNNDPIAL.-       | 2695.38 | 1.06  | 2 | 1.20E-03 | 0.93 | 4.25 | 0.55 |
| R.LAAGSGSVSLEDTTVKYLSETTAR.T          | 2456.25 | 0.40  | 2 | 1.49E-06 | 0.93 | 4.25 | 0.63 |
| K.LDITSRNGGTAQVILTMPQQLAGKDNNDPIAL.-  | 3364.75 | 1.64  | 3 | 3.74E-02 | 0.91 | 4.19 | 0.45 |
| R.TVDQIFLTVR.L                        | 1191.67 | 0.36  | 2 | 1.98E-04 | 0.97 | 4.19 | 0.60 |
| R.NGGTAQVILTMPQQLAGKDNNDPIAL.-        | 2679.38 | 1.23  | 2 | 5.95E-02 | 0.90 | 4.17 | 0.49 |
| R.TVDQIFLTVR.L                        | 1191.67 | 0.34  | 2 | 5.67E-04 | 0.97 | 4.17 | 0.58 |
| R.NGGTAQVILTM*PQQLAGKDNNDPIAL.-       | 2695.38 | 1.56  | 3 | 4.51E-06 | 0.95 | 4.15 | 0.59 |
| R.NGGTAQVILTM*PQQLAGKDNNDPIAL.-       | 2695.38 | 1.52  | 3 | 3.64E-07 | 0.93 | 4.15 | 0.58 |
| K.TGEERTVDQIFLTVR.L                   | 1763.93 | 1.07  | 2 | 4.61E-07 | 0.94 | 4.12 | 0.50 |
| R.LAAGSGSVSLEDTTVKYLSETTAR.T          | 2456.25 | 0.43  | 2 | 1.66E-03 | 0.91 | 4.12 | 0.55 |
| K.TGEERTVDQIFLTVR.L                   | 1763.93 | 0.55  | 2 | 1.26E-04 | 0.94 | 4.11 | 0.52 |
| R.TVDQIFLTVR.L                        | 1191.67 | 0.36  | 2 | 5.09E-04 | 0.97 | 4.10 | 0.56 |
| R.NGGTAQVILTM*PQQLAGKDNNDPIAL.-       | 2695.38 | 1.80  | 3 | 3.25E-02 | 0.92 | 4.09 | 0.63 |
| R.LAAGSGSVSLEDTTVKYLSETTAR.T          | 2456.25 | 0.84  | 2 | 1.37E-08 | 0.94 | 4.04 | 0.65 |
| R.LAAGSGSVSLEDTTVK.Y                  | 1534.80 | 0.25  | 2 | 1.63E-09 | 0.97 | 4.04 | 0.69 |
| K.LDITSRNGGTAQVILTMPQQLAGKDNNDPIAL.-  | 3364.75 | 1.44  | 3 | 2.42E-04 | 0.91 | 4.00 | 0.47 |
| K.LDITSRNGGTAQVILTMPQQLAGKDNNDPIAL.-  | 3364.75 | 1.79  | 3 | 4.79E-03 | 0.84 | 3.99 | 0.45 |
| R.TVDQIFLTVR.L                        | 1191.67 | 0.22  | 2 | 9.99E-04 | 0.97 | 3.96 | 0.57 |
| R.NGGTAQVILTM*PQQLAGKDNNDPIAL.-       | 2695.38 | 1.78  | 2 | 1.04E-04 | 0.87 | 3.96 | 0.53 |
| K.TGEERTVDQIFLTVR.L                   | 1763.93 | 0.30  | 2 | 6.85E-06 | 0.92 | 3.96 | 0.54 |
| R.NGGTAQVILTM*PQQLAGKDNNDPIAL.-       | 2695.38 | 1.72  | 2 | 6.57E-04 | 0.88 | 3.92 | 0.47 |
| R.NGGTAQVILTMPQQLAGKDNNDPIAL.-        | 2679.38 | 1.99  | 2 | 8.04E-03 | 0.86 | 3.92 | 0.41 |
| R.LAAGSGSVSLEDTTVKYLSETTAR.T          | 2456.25 | 0.11  | 2 | 9.61E-06 | 0.93 | 3.89 | 0.55 |
| R.TVDQIFLTVR.L                        | 1191.67 | 0.16  | 2 | 3.11E-05 | 0.97 | 3.86 | 0.56 |
| R.NGGTAQVILTM*PQQLAGKDNNDPIAL.-       | 2695.38 | 1.44  | 3 | 4.27E-06 | 0.94 | 3.86 | 0.49 |
| R.LAAGSGSVSLEDTTVKYLSETTAR.T          | 2456.25 | 0.63  | 2 | 2.12E-09 | 0.92 | 3.86 | 0.65 |
| K.TGEERTVDQIFLTVR.L                   | 1763.93 | 0.35  | 2 | 1.89E-08 | 0.93 | 3.85 | 0.55 |
| K.TGEERTVDQIFLTVR.L                   | 1763.93 | 0.63  | 2 | 2.45E-08 | 0.93 | 3.85 | 0.63 |
| R.NGGTAQVILTMPQQLAGKDNNDPIAL.-        | 2679.38 | 1.88  | 2 | 2.73E-01 | 0.90 | 3.85 | 0.61 |
| K.TGEERTVDQIFLTVR.L                   | 1763.93 | 0.49  | 2 | 1.77E-10 | 0.95 | 3.84 | 0.60 |
| R.NGGTAQVILTMPQQLAGKDNNDPIAL.-        | 2679.38 | 1.79  | 2 | 8.79E-02 | 0.90 | 3.83 | 0.59 |
| R.LAAGSGSVSLEDTTVK.Y                  | 1534.80 | -0.14 | 1 | 7.93E-04 | 0.94 | 3.82 | 0.66 |
| R.LAAGSGSVSLEDTTVKYLSETTAR.T          | 2456.25 | 0.58  | 2 | 1.87E-09 | 0.93 | 3.80 | 0.63 |
| R.NGGTAQVILTM*PQQLAGKDNNDPIAL.-       | 2695.38 | 1.52  | 3 | 1.01E-04 | 0.90 | 3.77 | 0.50 |
| R.NGGTAQVILTMPQQLAGKDNNDPIAL.-        | 2679.38 | 1.36  | 2 | 9.60E-03 | 0.85 | 3.75 | 0.42 |
| R.NGGTAQVILTMPQQLAGKDNNDPIAL.-        | 2679.38 | 1.86  | 3 | 1.25E-07 | 0.95 | 3.75 | 0.58 |
| R.NGGTAQVILTM*PQQLAGKDNNDPIAL.-       | 2695.38 | 1.83  | 2 | 4.14E-04 | 0.90 | 3.74 | 0.65 |
| R.LAAGSGSVSLEDTTVKYLSETTAR.T          | 2456.25 | 0.48  | 2 | 3.55E-06 | 0.90 | 3.72 | 0.50 |
| R.LAAGSGSVSLEDTTVKYLSETTAR.T          | 2456.25 | 0.92  | 2 | 5.59E-05 | 0.93 | 3.70 | 0.64 |
| K.LDITSRNGGTAQVILTMPQQLAGKDNNDPIAL.-  | 3364.75 | 1.87  | 3 | 3.77E-02 | 0.82 | 3.68 | 0.43 |
| R.NGGTAQVILTMPQQLAGKDNNDPIAL.-        | 2679.38 | 1.32  | 2 | 1.51E-02 | 0.84 | 3.67 | 0.43 |
| R.NGGTAQVILTM*PQQLAGK.D               | 1842.98 | 0.17  | 2 | 4.10E-04 | 0.91 | 3.66 | 0.49 |
| K.TGEERTVDQIFLTVR.L                   | 1763.93 | 0.36  | 2 | 2.47E-10 | 0.93 | 3.65 | 0.60 |
| R.LAAGSGSVSLEDTTVK.Y                  | 1534.80 | 1.27  | 3 | 1.46E-01 | 0.92 | 3.60 | 0.41 |
| R.LAAGSGSVSLEDTTVK.Y                  | 1534.80 | -0.10 | 1 | 6.67E-05 | 0.93 | 3.58 | 0.67 |
| K.LDITSRNGGTAQVILTMPQQLAGKDNNDPIAL.-  | 3364.75 | 1.88  | 3 | 4.13E-03 | 0.87 | 3.58 | 0.50 |
| R.LAAGSGSVSLEDTTVKYLSETTAR.T          | 2456.25 | 0.93  | 2 | 2.31E-05 | 0.90 | 3.57 | 0.61 |
| K.LDITSRNGGTAQVILTMPQQLAGKDNNDPIAL.-  | 3364.75 | 1.82  | 3 | 2.80E-03 | 0.80 | 3.56 | 0.28 |
| R.NGGTAQVILTM*PQQLAGK.D               | 1842.98 | 1.97  | 3 | 6.85E-02 | 0.94 | 3.53 | 0.50 |
| R.TVDQIFLTVR.L                        | 1191.67 | 0.01  | 2 | 1.73E-04 | 0.96 | 3.50 | 0.55 |
| K.LDITSRNGGTAQVILTM*PQQLAGKDNNDPIAL.- | 3380.75 | 1.96  | 3 | 1.21E-02 | 0.86 | 3.49 | 0.51 |
| R.LAAGSGSVSLEDTTVK.Y                  | 1534.80 | 0.27  | 1 | 8.38E-05 | 0.88 | 3.48 | 0.62 |
| R.LAAGSGSVSLEDTTVKYLSETTAR.T          | 2456.25 | 1.15  | 2 | 2.28E-07 | 0.87 | 3.42 | 0.59 |
| R.LAAGSGSVSLEDTTVK.Y                  | 1534.80 | 0.76  | 3 | 4.84E-04 | 0.94 | 3.42 | 0.60 |
| R.NGGTAQVILTM*PQQLAGKDNNDPIAL.-       | 2695.38 | 1.46  | 3 | 3.33E-08 | 0.90 | 3.39 | 0.45 |
| K.TGEERTVDQIFLTVR.L                   | 1763.93 | 0.14  | 2 | 3.89E-05 | 0.92 | 3.38 | 0.61 |
| K.LDITSRNGGTAQVILTM*PQQLAGKDNNDPIAL.- | 3380.75 | 1.87  | 3 | 1.36E-02 | 0.84 | 3.34 | 0.52 |
| K.LDITSRNGGTAQVILTM*PQQLAGKDNNDPIAL.- | 3380.75 | 1.33  | 3 | 1.08E-02 | 0.89 | 3.32 | 0.42 |

|                                        |         |       |   |          |      |      |      |
|----------------------------------------|---------|-------|---|----------|------|------|------|
| R.LAAGSGSVSLEDTTVKYLSETTAR.T           | 2456.25 | 0.44  | 2 | 5.38E-07 | 0.90 | 3.31 | 0.66 |
| R.LAAGSGSVSLEDTTVK.Y                   | 1534.80 | 0.67  | 3 | 1.00E+00 | 0.86 | 3.26 | 0.57 |
| R.LAAGSGSVSLEDTTVKYLSETTAR.T           | 2456.25 | 1.01  | 2 | 5.30E-07 | 0.87 | 3.20 | 0.63 |
| R.LAAGSGSVSLEDTTVK.Y                   | 1534.80 | 0.34  | 1 | 1.77E-05 | 0.90 | 3.14 | 0.57 |
| K.LDITSRNGGTAQVILTMPQQLAGKDNNNDPIAL.-  | 3364.75 | 1.95  | 3 | 7.92E-02 | 0.73 | 3.13 | 0.43 |
| K.TGEERTVDQIFLTVR.L                    | 1763.93 | 0.34  | 2 | 5.07E-05 | 0.91 | 3.12 | 0.56 |
| R.NGGTAQVILTM*PQQLAGKDNNNDPIAL.-       | 2695.38 | 1.20  | 2 | 1.11E-03 | 0.75 | 3.10 | 0.43 |
| K.TGEERTVDQIFLTVR.L                    | 1763.93 | 0.11  | 2 | 1.52E-05 | 0.89 | 3.08 | 0.54 |
| K.YLSETTAR.T                           | 940.47  | 0.53  | 2 | 3.18E-05 | 0.95 | 3.08 | 0.52 |
| R.NGGTAQVILTMPQQLAGKDNNNDPIAL.-        | 2679.38 | 1.28  | 3 | 2.66E-07 | 0.93 | 3.01 | 0.58 |
| K.LDITSRNGGTAQVILTMPQQLAGKDNNNDPIAL.-  | 3364.75 | 1.67  | 3 | 6.68E-02 | 0.75 | 3.01 | 0.33 |
| K.LDITSRNGGTAQVILTMPQQLAGKDNNNDPIAL.-  | 3364.75 | 1.93  | 3 | 6.03E-01 | 0.77 | 3.00 | 0.46 |
| R.LAAGSGSVSLEDTTVK.Y                   | 1534.80 | -0.11 | 1 | 1.30E-03 | 0.89 | 2.99 | 0.67 |
| R.LAAGSGSVSLEDTTVKYLSETTAR.T           | 2456.25 | 0.94  | 2 | 1.93E-05 | 0.86 | 2.99 | 0.60 |
| R.NGGTAQVILTM*PQQLAGKDNNNDPIAL.-       | 2695.38 | 0.63  | 2 | 1.34E-04 | 0.84 | 2.99 | 0.59 |
| R.NGGTAQVILTMPQQLAGK.D                 | 1826.98 | 0.74  | 3 | 5.94E-02 | 0.89 | 2.98 | 0.50 |
| R.NGGTAQVILTMPQQLAGKDNNNDPIAL.-        | 2679.38 | 1.18  | 3 | 5.40E-03 | 0.83 | 2.95 | 0.51 |
| R.NGGTAQVILTMPQQLAGK.D                 | 1826.98 | 0.76  | 2 | 1.14E-02 | 0.79 | 2.94 | 0.52 |
| K.TGEERTVDQIFLTVR.L                    | 1763.93 | 0.92  | 2 | 1.85E-04 | 0.87 | 2.93 | 0.64 |
| K.YLSETTAR.T                           | 940.47  | 0.50  | 2 | 2.30E-03 | 0.92 | 2.90 | 0.54 |
| R.NGGTAQVILTMPQQLAGKDNNNDPIAL.-        | 2679.38 | 1.73  | 3 | 3.12E-03 | 0.87 | 2.88 | 0.47 |
| R.NGGTAQVILTMPQQLAGKDNNNDPIAL.-        | 2679.38 | 1.49  | 3 | 7.91E-03 | 0.89 | 2.87 | 0.50 |
| K.LDITSRNGGTAQVILTMPQQLAGKDNNNDPIAL.-  | 3364.75 | 1.10  | 3 | 5.98E-01 | 0.78 | 2.87 | 0.44 |
| R.LAAGSGSVSLEDTTVKYLSETTAR.T           | 2456.25 | 0.02  | 2 | 4.36E-04 | 0.74 | 2.86 | 0.57 |
| K.YLSETTAR.T                           | 940.47  | 0.61  | 2 | 1.54E-04 | 0.93 | 2.86 | 0.50 |
| R.NGGTAQVILTMPQQLAGK.D                 | 1826.98 | 1.57  | 3 | 1.65E-01 | 0.75 | 2.76 | 0.16 |
| R.LAAGSGSVSLEDTTVK.Y                   | 1534.80 | -0.09 | 1 | 9.22E-01 | 0.88 | 2.74 | 0.69 |
| R.NGGTAQVILTM*PQQLAGKDNNNDPIAL.-       | 2695.38 | 1.38  | 3 | 4.53E-06 | 0.81 | 2.70 | 0.54 |
| R.NGGTAQVILTMPQQLAGK.D                 | 1826.98 | 0.72  | 2 | 2.54E-02 | 0.75 | 2.70 | 0.55 |
| K.LDITSRNGGTAQVILTMPQQLAGKDNNNDPIAL.-  | 3364.75 | 1.20  | 3 | 8.58E-02 | 0.84 | 2.68 | 0.59 |
| R.NGGTAQVILTMPQQLAGK.D                 | 1826.98 | 0.46  | 3 | 2.24E-03 | 0.69 | 2.68 | 0.13 |
| R.NGGTAQVILTM*PQQLAGKDNNNDPIAL.-       | 2695.38 | 1.46  | 3 | 5.79E-02 | 0.82 | 2.67 | 0.50 |
| K.TGEERTVDQIFLTVR.L                    | 1763.93 | 0.78  | 2 | 7.71E-03 | 0.91 | 2.66 | 0.53 |
| K.LDITSRNGGTAQVILTM*PQQLAGKDNNNDPIAL.- | 3380.75 | 1.37  | 3 | 2.16E-02 | 0.72 | 2.65 | 0.36 |
| K.LDITSRNGGTAQVILTMPQQLAGKDNNNDPIAL.-  | 3364.75 | 1.96  | 3 | 3.62E-05 | 0.55 | 2.64 | 0.31 |
| R.LAAGSGSVSLEDTTVK.Y                   | 1534.80 | -0.14 | 1 | 2.76E-03 | 0.77 | 2.62 | 0.57 |
| R.NGGTAQVILTM*PQQLAGKDNNNDPIAL.-       | 2695.38 | 1.28  | 3 | 8.29E-02 | 0.78 | 2.61 | 0.47 |
| K.YLSETTAR.T                           | 940.47  | 0.16  | 2 | 8.64E-05 | 0.92 | 2.59 | 0.43 |
| R.NGGTAQVILTM*PQQLAGKDNNNDPIAL.-       | 2695.38 | 0.45  | 2 | 9.33E-06 | 0.58 | 2.59 | 0.46 |
| R.LAAGSGSVSLEDTTVK.Y                   | 1534.80 | -0.20 | 1 | 5.90E-01 | 0.72 | 2.56 | 0.61 |
| R.NGGTAQVILTM*PQQLAGKDNNNDPIAL.-       | 2695.38 | 1.91  | 3 | 1.41E-03 | 0.65 | 2.54 | 0.46 |
| K.LDITSRNGGTAQVILTM*PQQLAGKDNNNDPIAL.- | 3380.75 | 1.75  | 3 | 4.51E-02 | 0.77 | 2.53 | 0.38 |
| R.NGGTAQVILTMPQQLAGK.D                 | 1826.98 | 1.28  | 2 | 2.32E-03 | 0.65 | 2.47 | 0.45 |
| K.YLSETTAR.T                           | 940.47  | 0.48  | 2 | 7.45E-05 | 0.93 | 2.39 | 0.51 |
| R.TVDQIFLTVR.L                         | 1191.67 | 0.05  | 1 | 2.14E-02 | 0.83 | 2.36 | 0.54 |
| K.LDITSR.N                             | 704.39  | 0.10  | 2 | 8.81E-02 | 0.89 | 2.36 | 0.29 |
| K.TGEERTVDQIFLTVR.L                    | 1763.93 | 1.70  | 2 | 1.81E-03 | 0.70 | 2.32 | 0.43 |
| R.NGGTAQVILTM*PQQLAGKDNNNDPIAL.-       | 2695.38 | 0.36  | 2 | 1.81E-05 | 0.74 | 2.31 | 0.56 |
| R.TVDQIFLTVR.L                         | 1191.67 | -0.03 | 1 | 9.30E-01 | 0.54 | 2.30 | 0.29 |
| R.NGGTAQVILTM*PQQLAGKDNNNDPIAL.-       | 2695.38 | -0.87 | 2 | 4.87E-03 | 0.61 | 2.29 | 0.53 |
| R.NGGTAQVILTMPQQLAGKDNNNDPIAL.-        | 2679.38 | 1.05  | 2 | 1.32E-01 | 0.49 | 2.26 | 0.35 |
| R.LAAGSGSVSLEDTTVK.Y                   | 1534.80 | 0.75  | 1 | 1.80E-02 | 0.60 | 2.23 | 0.56 |
| K.YLSETTAR.T                           | 940.47  | 0.30  | 2 | 3.35E-01 | 0.92 | 2.17 | 0.58 |
| K.LDITSR.N                             | 704.39  | 0.29  | 2 | 9.55E-02 | 0.75 | 2.11 | 0.31 |
| K.LDITSR.N                             | 704.39  | 0.32  | 2 | 5.63E-02 | 0.81 | 2.06 | 0.27 |
| K.LDITSR.N                             | 704.39  | 0.31  | 2 | 6.59E-02 | 0.78 | 2.05 | 0.39 |
| R.TVDQIFLTVR.L                         | 1191.67 | -0.01 | 1 | 2.69E-01 | 0.33 | 1.91 | 0.50 |
| K.DNNNDPIAL.-                          | 871.42  | -0.15 | 1 | 7.52E-03 | 0.65 | 1.79 | 0.56 |
| K.DNNNDPIAL.-                          | 871.42  | -0.15 | 1 | 3.25E-02 | 0.68 | 1.77 | 0.60 |
| R.TVDQIFLTVR.L                         | 1191.67 | -0.14 | 1 | 3.46E-01 | 0.05 | 1.77 | 0.16 |
| R.TVDQIFLTVR.L                         | 1191.67 | 0.08  | 1 | 9.42E-01 | 0.28 | 1.75 | 0.39 |
| K.YLSETTAR.T                           | 940.47  | -0.02 | 1 | 1.15E-01 | 0.49 | 1.72 | 0.30 |
| K.DNNNDPIAL.-                          | 871.42  | -0.11 | 1 | 4.98E-04 | 0.67 | 1.72 | 0.63 |
| K.DNNNDPIAL.-                          | 871.42  | 0.22  | 1 | 1.04E-02 | 0.27 | 1.70 | 0.44 |

|             |                                    |         |       |   |          |      |      |      |
|-------------|------------------------------------|---------|-------|---|----------|------|------|------|
|             | R.TVDQIFLTVR.L                     | 1191.67 | -0.02 | 1 | 9.04E-01 | 0.11 | 1.66 | 0.26 |
|             | K.DNNDPIAL.-                       | 871.42  | 0.17  | 1 | 2.09E-02 | 0.39 | 1.58 | 0.48 |
|             | K.DNNDPIAL.-                       | 871.42  | -0.08 | 1 | 1.79E-01 | 0.49 | 1.54 | 0.44 |
| <b>GluC</b> | D.ITSRNGGTAQVILTM*PQQLAGKDNDPIAL.- | 3152.64 | 1.66  | 3 | 2.99E-01 | 0.95 | 5.16 | 0.58 |
|             | D.ITSRNGGTAQVILTM*PQQLAGKDND.P     | 2758.38 | 1.97  | 3 | 2.04E-03 | 0.94 | 4.23 | 0.49 |
|             | D.ITSRNGGTAQVILTMPQQLAGKDNDPIAL.-  | 3136.64 | 1.06  | 3 | 2.34E-04 | 0.91 | 4.04 | 0.56 |
|             | D.ITSRNGGTAQVILTMPQQLAGKDNDPIAL.-  | 3136.64 | 0.92  | 3 | 1.54E-05 | 0.84 | 3.40 | 0.41 |
|             | E.DTTVKYLSE.T                      | 1055.53 | 0.18  | 2 | 3.62E-04 | 0.94 | 3.31 | 0.48 |
|             | D.ITSRNGGTAQVILTMPQQLAGKDNDPIAL.-  | 3136.64 | 1.26  | 3 | 8.28E-04 | 0.83 | 3.31 | 0.53 |
|             | E.DTTVKYLSE.T                      | 1055.53 | 0.27  | 2 | 3.81E-04 | 0.94 | 3.15 | 0.47 |
|             | D.ITSRNGGTAQVILTM*PQQLAGKDNDPIAL.- | 3152.64 | 1.31  | 3 | 1.80E-02 | 0.77 | 3.12 | 0.38 |
|             | E.DTTVKYLSE.T                      | 1055.53 | -0.01 | 2 | 3.66E-04 | 0.93 | 2.92 | 0.54 |
|             | E.GDNTNGTATGQTVKLD.I               | 1591.76 | 1.13  | 2 | 4.32E-03 | 0.74 | 2.80 | 0.33 |
|             | E.DTTVKYLSE.T                      | 1055.53 | -0.15 | 1 | 4.60E-04 | 0.80 | 2.40 | 0.48 |
|             | E.DTTVKYLSE.T                      | 1055.53 | 0.52  | 1 | 6.40E-02 | 0.82 | 2.27 | 0.52 |
|             | E.GDNTNGTATGQTVKLD.I               | 1591.76 | 1.34  | 2 | 1.02E-02 | 0.23 | 2.15 | 0.20 |

### Trypsin and GluC

|  |                                |         |      |   |          |      |      |      |
|--|--------------------------------|---------|------|---|----------|------|------|------|
|  | R.NGGTAQVILTMPQQLAGKDND.P      | 2285.12 | 1.39 | 3 | 7.88E-05 | 0.98 | 5.98 | 0.58 |
|  | R.NGGTAQVILTMPQQLAGKDND.P      | 2285.12 | 0.37 | 2 | 8.14E-07 | 0.97 | 5.61 | 0.58 |
|  | R.NGGTAQVILTMPQQLAGKDND.P      | 2285.12 | 0.73 | 3 | 3.63E-04 | 0.97 | 5.58 | 0.62 |
|  | R.NGGTAQVILTMPQQLAGKDND.P      | 2285.12 | 1.58 | 3 | 1.47E-03 | 0.98 | 5.38 | 0.55 |
|  | R.NGGTAQVILTM*PQQLAGK.D        | 1842.98 | 0.24 | 2 | 2.56E-06 | 0.98 | 5.25 | 0.53 |
|  | R.NGGTAQVILTMPQQLAGKDND.P      | 2285.12 | 0.24 | 2 | 4.24E-06 | 0.96 | 5.20 | 0.60 |
|  | R.NGGTAQVILTMPQQLAGKDND.P      | 2285.12 | 1.03 | 2 | 1.49E-05 | 0.96 | 5.15 | 0.60 |
|  | R.NGGTAQVILTMPQQLAGKDND.P      | 2285.12 | 1.42 | 3 | 2.11E-03 | 0.96 | 5.00 | 0.54 |
|  | R.NGGTAQVILTM*PQQLAGKDNDPIAL.- | 2695.38 | 0.94 | 3 | 2.07E-05 | 0.97 | 4.97 | 0.61 |
|  | R.NGGTAQVILTM*PQQLAGKDNDPIAL.- | 2695.38 | 1.26 | 3 | 1.88E-07 | 0.98 | 4.94 | 0.65 |
|  | R.NGGTAQVILTM*PQQLAGK.D        | 1842.98 | 0.46 | 2 | 2.75E-08 | 0.97 | 4.90 | 0.53 |
|  | R.LAAGSGSVSLEDTTVK.Y           | 1534.80 | 0.41 | 2 | 9.39E-08 | 0.97 | 4.87 | 0.64 |
|  | R.LAAGSGSVSLEDTTVK.Y           | 1534.80 | 0.19 | 2 | 5.74E-07 | 0.97 | 4.85 | 0.58 |
|  | R.NGGTAQVILTM*PQQLAGK.D        | 1842.98 | 0.41 | 2 | 1.68E-05 | 0.97 | 4.81 | 0.50 |
|  | R.NGGTAQVILTM*PQQLAGK.D        | 1842.98 | 0.88 | 2 | 5.50E-05 | 0.97 | 4.74 | 0.54 |
|  | R.NGGTAQVILTMPQQLAGKDNDPIAL.-  | 2679.38 | 1.24 | 2 | 3.31E-03 | 0.93 | 4.68 | 0.66 |
|  | R.NGGTAQVILTMPQQLAGKDND.P      | 2285.12 | 1.60 | 3 | 2.26E-03 | 0.93 | 4.65 | 0.45 |
|  | R.NGGTAQVILTM*PQQLAGKDNDPIAL.- | 2695.38 | 0.31 | 3 | 5.30E-05 | 0.95 | 4.64 | 0.60 |
|  | R.NGGTAQVILTMPQQLAGKDND.P      | 2285.12 | 1.61 | 3 | 5.14E-05 | 0.95 | 4.60 | 0.55 |
|  | R.LAAGSGSVSLEDTTVKYLSE.T       | 2027.02 | 1.03 | 2 | 2.08E-05 | 0.96 | 4.57 | 0.63 |
|  | R.NGGTAQVILTM*PQQLAGK.D        | 1842.98 | 0.85 | 2 | 6.80E-08 | 0.96 | 4.52 | 0.50 |
|  | R.NGGTAQVILTMPQQLAGKDND.P      | 2285.12 | 1.38 | 2 | 2.06E-05 | 0.95 | 4.51 | 0.54 |
|  | E.ERTVDQIFLTVR.L               | 1476.82 | 0.56 | 2 | 4.97E-06 | 0.97 | 4.49 | 0.43 |
|  | R.NGGTAQVILTM*PQQLAGKDNDPIAL.- | 2695.38 | 0.47 | 2 | 1.79E-04 | 0.94 | 4.44 | 0.63 |
|  | R.TVDQIFLTVR.L                 | 1191.67 | 0.37 | 2 | 7.22E-04 | 0.97 | 4.43 | 0.50 |
|  | R.NGGTAQVILTMPQQLAGKDND.P      | 2285.12 | 1.73 | 2 | 4.08E-02 | 0.93 | 4.42 | 0.48 |
|  | R.NGGTAQVILTMPQQLAGKDNDPIAL.-  | 2679.38 | 1.34 | 2 | 2.95E-04 | 0.91 | 4.39 | 0.54 |
|  | R.NGGTAQVILTM*PQQLAGKDNDPIAL.- | 2695.38 | 1.55 | 3 | 1.58E-06 | 0.95 | 4.38 | 0.64 |
|  | R.NGGTAQVILTMPQQLAGK.D         | 1826.98 | 0.68 | 3 | 4.90E-02 | 0.94 | 4.36 | 0.32 |
|  | R.NGGTAQVILTMPQQLAGK.D         | 1826.98 | 0.72 | 3 | 4.59E-03 | 0.95 | 4.36 | 0.48 |
|  | R.NGGTAQVILTM*PQQLAGKDND.P     | 2301.12 | 1.37 | 2 | 3.71E-07 | 0.95 | 4.35 | 0.46 |
|  | R.NGGTAQVILTMPQQLAGKDNDPIAL.-  | 2679.38 | 1.46 | 2 | 1.43E-04 | 0.91 | 4.32 | 0.59 |
|  | R.TVDQIFLTVR.L                 | 1191.67 | 0.27 | 2 | 3.19E-04 | 0.97 | 4.29 | 0.58 |
|  | R.NGGTAQVILTM*PQQLAGKDNDPIAL.- | 2695.38 | 0.48 | 2 | 3.71E-03 | 0.94 | 4.26 | 0.65 |
|  | R.TVDQIFLTVR.L                 | 1191.67 | 0.81 | 2 | 2.13E-03 | 0.96 | 4.26 | 0.47 |
|  | R.LAAGSGSVSLE.D                | 990.51  | 0.05 | 2 | 1.28E-05 | 0.97 | 4.24 | 0.42 |
|  | R.NGGTAQVILTM*PQQLAGK.D        | 1842.98 | 0.68 | 2 | 3.65E-04 | 0.94 | 4.20 | 0.53 |
|  | R.LAAGSGSVSLE.D                | 990.51  | 0.10 | 2 | 1.12E-05 | 0.97 | 4.18 | 0.40 |
|  | R.NGGTAQVILTMPQQLAGKDNDPIAL.-  | 2679.38 | 1.50 | 3 | 3.08E-05 | 0.93 | 4.11 | 0.47 |
|  | R.LAAGSGSVSLE.D                | 990.51  | 0.10 | 2 | 1.65E-05 | 0.97 | 4.07 | 0.42 |
|  | R.TVDQIFLTVR.L                 | 1191.67 | 0.78 | 2 | 4.85E-04 | 0.97 | 4.06 | 0.52 |
|  | R.LAAGSGSVSLE.D                | 990.51  | 0.13 | 2 | 3.02E-06 | 0.97 | 4.02 | 0.37 |
|  | R.NGGTAQVILTMPQQLAGKDNDPIAL.-  | 2679.38 | 1.60 | 2 | 1.70E-04 | 0.87 | 4.01 | 0.56 |
|  | R.NGGTAQVILTM*PQQLAGKDNDPIAL.- | 2695.38 | 1.48 | 2 | 3.91E-04 | 0.90 | 4.00 | 0.64 |

|                                |         |       |   |          |      |      |      |
|--------------------------------|---------|-------|---|----------|------|------|------|
| E.RTVDQIFLTVR.L                | 1347.77 | 0.43  | 2 | 1.72E-04 | 0.97 | 3.99 | 0.53 |
| R.NGGTAQVILTM*PQQLAGKDNDPIAL.- | 2695.38 | 1.65  | 2 | 6.85E-04 | 0.91 | 3.98 | 0.57 |
| R.TVDQIFLTVR.L                 | 1191.67 | 0.84  | 2 | 7.29E-06 | 0.97 | 3.97 | 0.58 |
| R.NGGTAQVILTMPQQLAGKDNDPIAL.-  | 2679.38 | 1.81  | 2 | 1.67E-04 | 0.84 | 3.97 | 0.43 |
| R.NGGTAQVILTMPQQLAGKDNDPIAL.-  | 2679.38 | 1.50  | 3 | 1.51E-03 | 0.94 | 3.96 | 0.60 |
| R.TVDQIFLTVR.L                 | 1191.67 | 0.14  | 2 | 1.58E-04 | 0.97 | 3.95 | 0.53 |
| E.RTVDQIFLTVR.L                | 1347.77 | 0.54  | 3 | 4.77E-03 | 0.93 | 3.94 | 0.26 |
| E.RTVDQIFLTVR.L                | 1347.77 | 0.35  | 3 | 1.46E-03 | 0.94 | 3.93 | 0.38 |
| E.RTVDQIFLTVR.L                | 1347.77 | 0.35  | 2 | 6.10E-04 | 0.96 | 3.93 | 0.50 |
| R.TVDQIFLTVR.L                 | 1191.67 | 0.14  | 2 | 6.83E-03 | 0.96 | 3.90 | 0.56 |
| E.ERTVDQIFLTVR.L               | 1476.82 | 0.84  | 2 | 1.18E-08 | 0.95 | 3.89 | 0.39 |
| R.NGGTAQVILTM*PQQLAGKDNDPIAL.- | 2695.38 | 0.87  | 2 | 3.49E-03 | 0.90 | 3.88 | 0.58 |
| E.GDNTNGTATGQTVKLD.I           | 1591.76 | 1.71  | 2 | 4.37E-02 | 0.90 | 3.85 | 0.44 |
| E.GDNTNGTATGQTVKLD.I           | 1591.76 | 1.58  | 2 | 6.24E-03 | 0.91 | 3.85 | 0.50 |
| R.NGGTAQVILTMPQQLAGKDNDPIAL.-  | 2679.38 | 2.00  | 3 | 3.71E-05 | 0.93 | 3.84 | 0.42 |
| E.ERTVDQIFLTVR.L               | 1476.82 | 0.24  | 3 | 7.04E-04 | 0.94 | 3.84 | 0.34 |
| R.LAAGSGSVSLE.D                | 990.51  | 0.21  | 2 | 1.55E-04 | 0.97 | 3.83 | 0.51 |
| R.LAAGSGSVSLE.D                | 990.51  | 0.06  | 2 | 2.93E-06 | 0.96 | 3.83 | 0.37 |
| E.ERTVDQIFLTVR.L               | 1476.82 | 0.80  | 3 | 7.29E-04 | 0.93 | 3.81 | 0.43 |
| R.NGGTAQVILTMPQQLAGKDNDPIAL.-  | 2679.38 | 1.88  | 3 | 5.29E-06 | 0.93 | 3.79 | 0.59 |
| E.RTVDQIFLTVR.L                | 1347.77 | 0.40  | 2 | 3.59E-04 | 0.96 | 3.78 | 0.47 |
| R.TVDQIFLTVR.L                 | 1191.67 | 0.43  | 2 | 2.98E-03 | 0.97 | 3.78 | 0.55 |
| E.RTVDQIFLTVR.L                | 1347.77 | 0.45  | 2 | 4.01E-09 | 0.95 | 3.77 | 0.51 |
| R.LAAGSGSVSLEDTTVKYLSE.T       | 2027.02 | 0.39  | 2 | 4.02E-02 | 0.93 | 3.75 | 0.57 |
| R.NGGTAQVILTMPQQLAGKDNDPIAL.-  | 2679.38 | 0.98  | 2 | 1.57E-03 | 0.87 | 3.74 | 0.53 |
| R.LAAGSGSVSLEDTTVKYLSE.T       | 2027.02 | -0.22 | 2 | 3.39E-07 | 0.96 | 3.72 | 0.57 |
| E.RTVDQIFLTVR.L                | 1347.77 | 0.49  | 3 | 2.90E-03 | 0.91 | 3.69 | 0.25 |
| E.RTVDQIFLTVR.L                | 1347.77 | 0.61  | 3 | 1.12E-03 | 0.93 | 3.68 | 0.29 |
| E.RTVDQIFLTVR.L                | 1347.77 | 0.58  | 2 | 4.34E-06 | 0.95 | 3.66 | 0.47 |
| E.RTVDQIFLTVR.L                | 1347.77 | 0.44  | 3 | 2.35E-03 | 0.94 | 3.65 | 0.33 |
| E.ERTVDQIFLTVR.L               | 1476.82 | 0.42  | 2 | 6.32E-05 | 0.95 | 3.60 | 0.39 |
| R.TVDQIFLTVR.L                 | 1191.67 | 0.12  | 2 | 3.48E-06 | 0.95 | 3.58 | 0.47 |
| E.RTVDQIFLTVR.L                | 1347.77 | 0.97  | 2 | 1.19E-01 | 0.96 | 3.58 | 0.50 |
| R.NGGTAQVILTM*PQQLAGKDNDPIAL.- | 2695.38 | 0.95  | 3 | 4.22E-04 | 0.90 | 3.52 | 0.42 |
| E.ERTVDQIFLTVR.L               | 1476.82 | 0.48  | 3 | 9.61E-07 | 0.89 | 3.51 | 0.40 |
| R.TVDQIFLTVR.L                 | 1191.67 | 0.68  | 2 | 5.02E-05 | 0.94 | 3.51 | 0.47 |
| R.NGGTAQVILTM*PQQLAGKDND.P     | 2301.12 | 1.42  | 2 | 1.28E-04 | 0.88 | 3.49 | 0.34 |
| E.DTTVKYLSE.T                  | 1055.53 | 0.28  | 2 | 3.37E-02 | 0.95 | 3.46 | 0.36 |
| R.NGGTAQVILTM*PQQLAGKDNDPIAL.- | 2695.38 | 0.64  | 2 | 5.81E-03 | 0.90 | 3.45 | 0.63 |
| E.ERTVDQIFLTVR.L               | 1476.82 | 0.68  | 2 | 1.69E-03 | 0.93 | 3.44 | 0.27 |
| E.DTTVKYLSE.T                  | 1055.53 | 0.40  | 2 | 3.40E-03 | 0.95 | 3.38 | 0.41 |
| E.ERTVDQIFLTVR.L               | 1476.82 | 0.40  | 3 | 1.07E-04 | 0.86 | 3.38 | 0.33 |
| E.GDNTNGTATGQTVKLD.I           | 1591.76 | 1.41  | 2 | 4.80E-01 | 0.90 | 3.38 | 0.49 |
| R.NGGTAQVILTMPQQLAGK.D         | 1826.98 | 1.99  | 3 | 4.24E-01 | 0.88 | 3.36 | 0.19 |
| R.NGGTAQVILTMPQQLAGKDND.P      | 2285.12 | -0.05 | 2 | 1.91E-02 | 0.85 | 3.35 | 0.48 |
| R.NGGTAQVILTMPQQLAGK.D         | 1826.98 | 1.48  | 3 | 2.11E-02 | 0.86 | 3.30 | 0.26 |
| R.NGGTAQVILTMPQQLAGKDND.P      | 2285.12 | 1.15  | 2 | 6.07E-06 | 0.77 | 3.28 | 0.38 |
| E.DTTVKYLSE.T                  | 1055.53 | 0.16  | 2 | 1.02E-03 | 0.95 | 3.20 | 0.40 |
| E.ERTVDQIFLTVR.L               | 1476.82 | 0.86  | 3 | 4.42E-01 | 0.90 | 3.19 | 0.36 |
| E.DTTVKYLSE.T                  | 1055.53 | -0.04 | 2 | 2.87E-04 | 0.94 | 3.18 | 0.44 |
| E.ERTVDQIFLTVR.L               | 1476.82 | 1.88  | 2 | 1.04E-03 | 0.92 | 3.18 | 0.36 |
| E.DTTVKYLSE.T                  | 1055.53 | 0.73  | 2 | 2.76E-04 | 0.94 | 3.17 | 0.38 |
| E.GDNTNGTATGQTVKLD.I           | 1591.76 | 1.45  | 2 | 3.01E-02 | 0.89 | 3.09 | 0.44 |
| E.RTVDQIFLTVR.L                | 1347.77 | 0.49  | 3 | 6.20E-03 | 0.86 | 3.07 | 0.31 |
| R.NGGTAQVILTM*PQQLAGKDNDPIAL.- | 2695.38 | 1.91  | 3 | 1.95E-04 | 0.83 | 3.03 | 0.33 |
| R.LAAGSGSVSLEDTTVKYLSE.T       | 2027.02 | 1.12  | 2 | 4.89E-02 | 0.82 | 3.03 | 0.42 |
| R.NGGTAQVILTMPQQLAGKDNDPIAL.-  | 2679.38 | 1.58  | 3 | 9.55E-05 | 0.89 | 2.97 | 0.44 |
| R.NGGTAQVILTMPQQLAGKDNDPIAL.-  | 2679.38 | 1.35  | 3 | 1.71E-02 | 0.65 | 2.93 | 0.21 |
| R.NGGTAQVILTMPQQLAGK.D         | 1826.98 | 1.14  | 2 | 2.33E-07 | 0.83 | 2.92 | 0.34 |
| R.NGGTAQVILTMPQQLAGK.D         | 1826.98 | 1.11  | 2 | 2.70E-03 | 0.84 | 2.92 | 0.39 |
| R.NGGTAQVILTM*PQQLAGKDNDPIAL.- | 2695.38 | 1.19  | 2 | 3.86E-04 | 0.66 | 2.91 | 0.41 |
| R.NGGTAQVILTMPQQLAGK.D         | 1942.01 | 1.56  | 2 | 1.06E-05 | 0.81 | 2.88 | 0.31 |
| E.DTTVKYLSE.T                  | 1055.53 | 0.11  | 2 | 1.29E-03 | 0.91 | 2.88 | 0.37 |
| E.GDNTNGTATGQTVKLD.I           | 1591.76 | 1.19  | 2 | 1.03E-07 | 0.87 | 2.84 | 0.34 |

|                                |         |       |   |          |      |      |      |
|--------------------------------|---------|-------|---|----------|------|------|------|
| R.NGGTAQVILTM*PQQLAGKDNDPIAL.- | 2695.38 | 0.63  | 3 | 5.76E-05 | 0.82 | 2.79 | 0.47 |
| R.NGGTAQVILTMPQQLAGKDNDPIAL.-  | 2679.38 | 1.39  | 3 | 1.93E-06 | 0.85 | 2.78 | 0.43 |
| R.NGGTAQVILTMPQQLAGKD.N        | 1942.01 | 1.51  | 2 | 4.85E-04 | 0.84 | 2.75 | 0.32 |
| R.NGGTAQVILTM*PQQLAGKDNDPIAL.- | 2695.38 | 1.71  | 3 | 3.15E-02 | 0.85 | 2.73 | 0.46 |
| R.LAAGSGSVSLEDTTVKYLSE.T       | 2027.02 | 1.58  | 2 | 9.64E-05 | 0.82 | 2.73 | 0.49 |
| R.NGGTAQVILTMPQQLAGK.D         | 1826.98 | 1.09  | 3 | 7.19E-01 | 0.70 | 2.70 | 0.25 |
| R.NGGTAQVILTMPQQLAGKDNDPIAL.-  | 2679.38 | 0.87  | 3 | 4.62E-03 | 0.73 | 2.67 | 0.43 |
| R.NGGTAQVILTM*PQQLAGKDNDPIAL.- | 2695.38 | 1.49  | 2 | 6.55E-03 | 0.49 | 2.67 | 0.34 |
| R.TVDQIFLTVR.L                 | 1191.67 | 1.14  | 2 | 8.61E-02 | 0.89 | 2.67 | 0.33 |
| E.ERTVDQIFLTVR.L               | 1476.82 | 0.39  | 2 | 6.02E-04 | 0.80 | 2.67 | 0.21 |
| R.NGGTAQVILTMPQQLAGK.D         | 1826.98 | 1.76  | 2 | 1.37E-03 | 0.68 | 2.56 | 0.27 |
| R.NGGTAQVILTM*PQQLAGKDNDPIAL.- | 2695.38 | 0.71  | 3 | 1.21E-03 | 0.83 | 2.54 | 0.54 |
| R.NGGTAQVILTMPQQLAGKDND.P      | 2285.12 | 0.31  | 2 | 2.18E-06 | 0.69 | 2.50 | 0.58 |
| D.TTVKYLSE.T                   | 940.50  | 0.23  | 2 | 2.20E-01 | 0.90 | 2.47 | 0.49 |
| R.NGGTAQVILTM*PQQLAGKDNDPIAL.- | 2695.38 | 0.57  | 2 | 3.08E-01 | 0.69 | 2.28 | 0.60 |
| R.LAAGSGSVSLEDTTVK.Y           | 1534.80 | 1.23  | 2 | 9.30E-01 | 0.56 | 2.23 | 0.43 |
| R.NGGTAQVILTMPQQLAGKDNDPIAL.-  | 2679.38 | 1.55  | 2 | 2.81E-02 | 0.44 | 2.23 | 0.37 |
| D.TTVKYLSE.T                   | 940.50  | 0.23  | 2 | 1.10E-02 | 0.83 | 2.16 | 0.43 |
| R.TVDQIFLTVR.L                 | 1191.67 | 1.11  | 2 | 5.84E-01 | 0.82 | 2.13 | 0.24 |
| K.DNDPIAL.-                    | 871.42  | 0.97  | 1 | 2.66E-01 | 0.42 | 1.92 | 0.27 |
| K.DNDPIAL.-                    | 871.42  | -0.22 | 1 | 1.85E-02 | 0.52 | 1.91 | 0.34 |
| K.DNDPIAL.-                    | 871.42  | 0.88  | 1 | 9.87E-02 | 0.37 | 1.84 | 0.23 |
| D.QIFLTVR.L                    | 876.53  | -0.04 | 1 | 5.38E-01 | 0.14 | 1.79 | 0.01 |
| K.DNDPIAL.-                    | 871.42  | 1.03  | 1 | 3.37E-01 | 0.23 | 1.68 | 0.27 |
| R.LAAGSGSVSLE.D                | 990.51  | 0.01  | 1 | 4.53E-01 | 0.20 | 1.66 | 0.40 |
| R.LAAGSGSVSLE.D                | 990.51  | -0.37 | 1 | 7.98E-01 | 0.03 | 1.53 | 0.09 |

\*methionine oxidation

1  
2



1

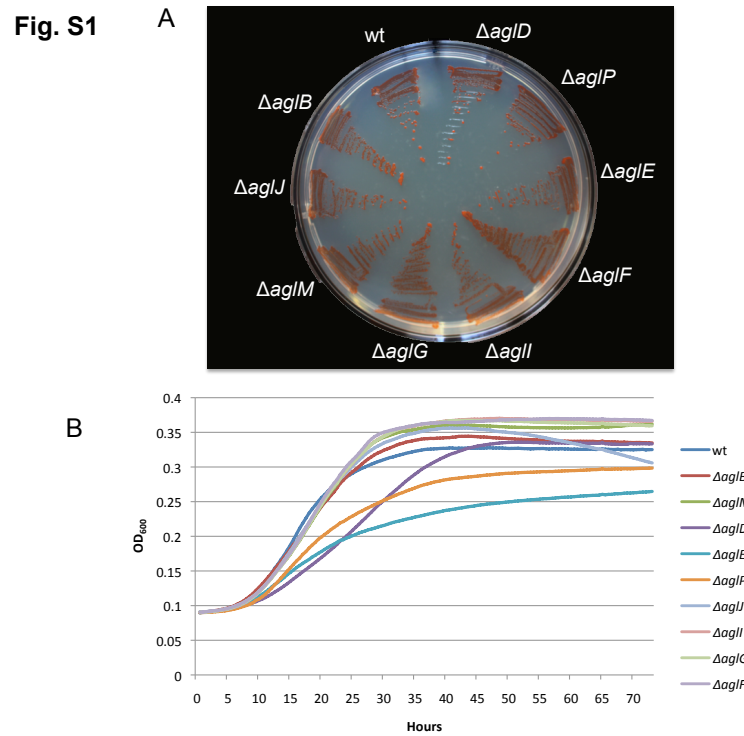

2

3 **Figure S1. Growth rates of most *agl* mutants do not correlate to motility**

4 **defects.** *Hfx. volcanii* H53 (wt) and  $\Delta agl$  strains were grown on 1.5% MGM agar

5 medium at 45°C for 4 days (A). Growth curves of *Hfx. volcanii* H53 (wt) and  $\Delta agl$

6 strains incubated in MGM liquid media at 45°C (B). Cell densities were determined by

7 measuring optical densities at 600 nm.

8
